# Supplementary material
Source: PubMed Central journal article supplement (PMC5793853)
Supplement: NIHMS924911-supplement-aa7b3e_Rees_Suppdata_pdf.pdf [file NIHMS924911-supplement-aa7b3e_Rees_Suppdata_pdf.pdf]

## Supplementary Materials

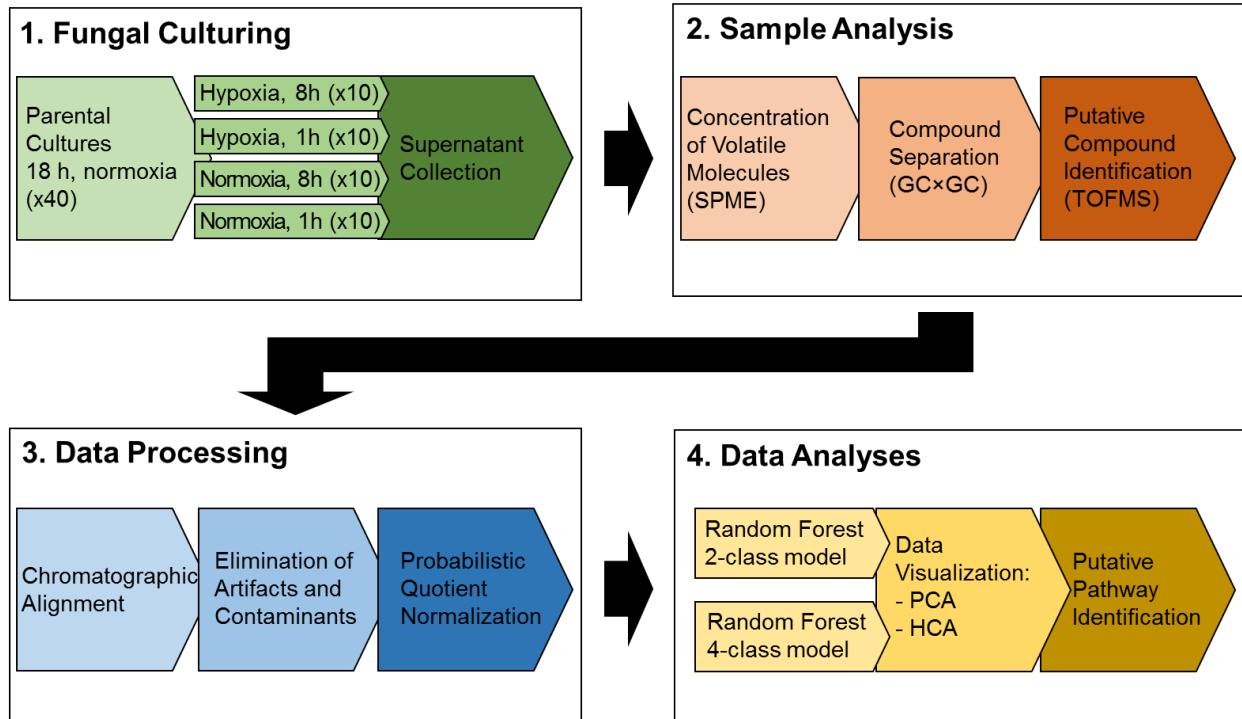

**Supplementary Figure S1.** Flow chart depicting methodology employed in the present study.

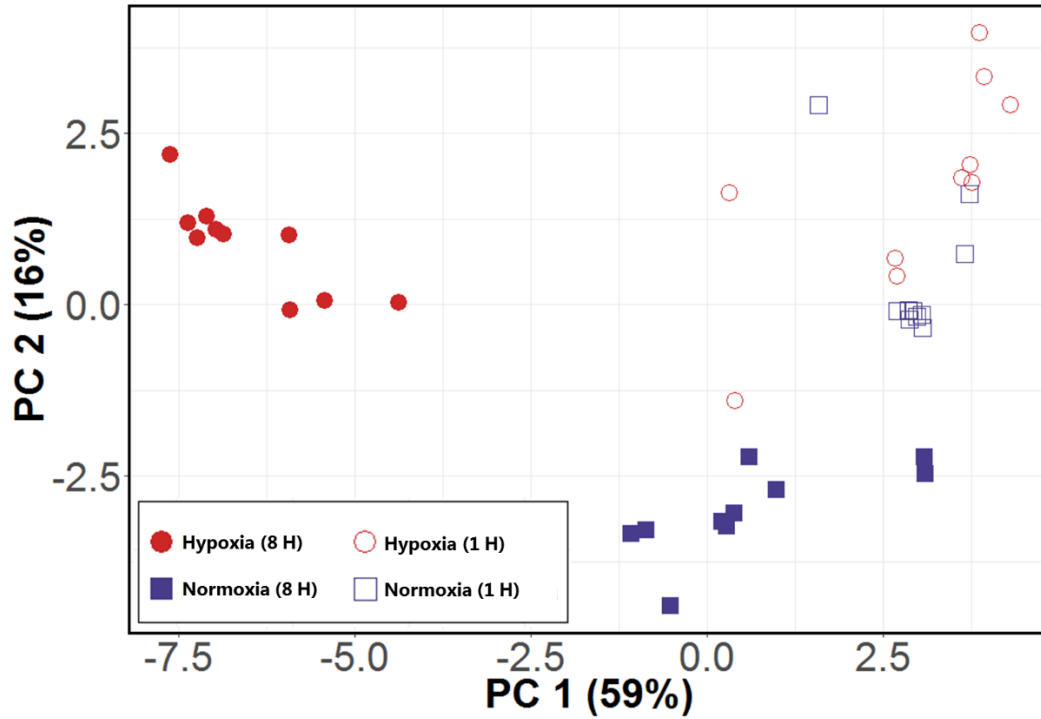

**Supplementary Figure S2.** PC scores plot generated using 19 top discriminatory volatile molecules for the differentiation between late hypoxia (filled red circles) and all other experimental conditions, with the “all others” group labeled by experimental condition (**late hypoxia**: filled blue squares, **early hypoxia**: hollow red circles, **early normoxia**: hollow blue squares). PC 1: 59%, PC 2: 16%.

**Supplementary Table S1.** Standard solutions utilized in present study

| <b>Compound</b>      | <b>Product #</b>        | <b>RTs: 1D, 2D (s)</b> | <b>RI</b> |
|----------------------|-------------------------|------------------------|-----------|
| 2,3-butanedione      | Sigma-Aldrich<br>11038  | 542, 1.070             | 627       |
| 2-methylpropanal     | Sigma-Aldrich<br>240788 | 476, 0.805             | -*        |
| 3-hydroxy-2-butanone | Sigma-Aldrich<br>40127  | 878, 1.720             | 778       |
| 3-methylbutanal      | Sigma-Aldrich<br>146455 | 682, 0.860             | 694       |

**RTs: 1D, 2D (s):** 1<sup>st</sup> and 2<sup>nd</sup> dimension retention times (s), **RI:** retention index, **-\*:** Less than 600 and not extrapolated.

**Supplementary Table S2.** Relative abundance of six putatively identified late hypoxia-associated volatile molecules

| Compound             | RTs:<br>1D, 2D (s) | RI   | Relative Abundance (TIC, 000s) |       |       |       |               |
|----------------------|--------------------|------|--------------------------------|-------|-------|-------|---------------|
|                      |                    |      | H8                             | H1    | N8    | N1    | Media<br>(H8) |
| 2,3-butanedione      | 546, 1.071         | 629  | 14 372                         | 1 131 | 2 935 | 1 991 | 945           |
| 2-methylpropanal     | 476, 0.808         | -*   | 98                             | 26    | 19    | 8     | 7             |
| 3-hydroxy-2-butanone | 883, 1.709         | 780  | 724                            | 1     | 29    | ND    | ND            |
| 3-methylbutanal      | 683, 0.846         | 694  | 81                             | 23    | 47    | 32    | 3             |
| Benzaldehyde         | 1448, 1.434        | 1030 | 2 378                          | 397   | 651   | 1 456 | 19            |
| Benzonitrile         | 1529, 1.545        | 1069 | 31                             | 5     | 6     | 8     | 7             |

**RTs: 1D, 2D (s):** 1<sup>st</sup> and 2<sup>nd</sup> dimension retention times (s), **RI:** retention index, **TIC, 000s:** total ion chromatogram (in thousands), **\*,** Less than 600 and not extrapolated, **ND:** Not detected.
